# Supplementary material for: Effect of Exercise Interventions on Irisin and Interleukin-6 Concentrations and Indicators of Carbohydrate Metabolism in Males with Metabolic Syndrome
Source: MDPI journal article supplement (doi:10.3390/jcm12010369), 2023-01-03
Supplement: s1 [file s1]

**Table S1. A detailed plan of aerobic-resistance training in aerobic-resistance group (EG2).**

|                                                                     | Trainings 1-3                                                                                     | Trainings 4-6                                                                                                                       | Trainings 6<                                                              |
|---------------------------------------------------------------------|---------------------------------------------------------------------------------------------------|-------------------------------------------------------------------------------------------------------------------------------------|---------------------------------------------------------------------------|
| Intensity of aerobic training<br>[% HR max]                         | 50                                                                                                | 70                                                                                                                                  | 70                                                                        |
| Duration of aerobic training<br>[min]                               | 20                                                                                                | 15                                                                                                                                  | 10                                                                        |
| Intensity of resistance training<br>[% 1 RM]                        | 50                                                                                                | 70                                                                                                                                  | 70                                                                        |
| Duration of resistance training<br>[min]                            | 30                                                                                                | 35                                                                                                                                  | 40                                                                        |
| Volume of resistance training<br>[exercises x series x repetitions] | 3 x 4 x 15                                                                                        | 6 x 3 x 12                                                                                                                          | 9 x 3 x 12                                                                |
| Breaks between series<br>[min]                                      | 2                                                                                                 | 1.5                                                                                                                                 | 1                                                                         |
| Type of training                                                    | Whole body training                                                                               | Training of antagonistic parts                                                                                                      | Training of antagonistic parts                                            |
| Specialised exercises                                               | 1. Supported push-ups (Smith machine)<br>2. One arm dumbbell row<br>3. Squads<br>4. Front support | 5. Barbell bench press<br>6. Standing dumbbell press<br>7. Bent dumbbell row<br>8. Reverse grip lat pulldown<br>9. Hip thrust lying | 10. Cable triceps extension<br>11. Standing dumbbell curl<br>12. Deadlift |

1RM – one repetition maximum, HR max – maximal heart rate.
